# Supplementary material for: Outcome and prognostic factors in infective endocarditis in dogs: 113 cases (2005‐2020)
Source: PubMed Central journal article supplement — J Vet Intern Med. 2022 Mar 9;36(2):429–40. doi: 10.1111/jvim.16380 (PMC8965206; doi:10.1111/jvim.16380), 2022-03-09
Supplement: JVIM-36-429-s001.pdf [file JVIM-36-429-s001.pdf]

| Characteristic                               | No. Affected/ Total<br>Population No. (%) | Survivors No. (%) | Non-Survivors No. (%) | OR (95% CI)        |
|----------------------------------------------|-------------------------------------------|-------------------|-----------------------|--------------------|
| <b>Sex</b>                                   |                                           |                   |                       |                    |
| Female                                       | 40/113 (66.9)                             | 17/47 (36.1)      | 20/57 (35.1)          | -                  |
| Male                                         | 73/113 (64.6)                             | 30/47 (63.8)      | 37/57 (64.9)          | 1.23(0.76-2.0)     |
| <b>Castration Status</b>                     |                                           |                   |                       |                    |
| Neutered                                     | 97/113 (85.9)                             | 43/47 (91.5)      | 48/57 (84.2)          | -                  |
| Non-Neutered                                 | 16/113 (14.1)                             | 4/47 (8.5)        | 9/57 (15.8)           | 2.25(0.69-7.31)    |
| <b>Age category</b>                          |                                           |                   |                       |                    |
| Less than 3 years                            | 16/113 (14.2)                             | 7/47 (14.8)       | 8/57 (14.0)           | -                  |
| 3 to less than 6 years                       | 20/113 (17.7)                             | 9/47 (19.1)       | 9/57 (18.8)           | 0.88(0.22-3.45)    |
| 6 to less than 9 years                       | 29/113 (25.7)                             | 9/47 (19.1)       | 19/57 (33.3)          | 1.85(0.51-6.69)    |
| 9 to less than 12 years                      | 29/113 (25.7)                             | 13/47 (27.7)      | 14/57 (24.6)          | 0.94(0.27-3.34)    |
| 12 years and older                           | 19/113 (16.8)                             | 9/47 (19.1)       | 7/57 (12.3)           | 0.68(0.17-2.80)    |
| <b>Weight category</b>                       |                                           |                   |                       |                    |
| Less than 10 kg                              | 14/113 (12.7)                             | 5/47 (10.6)       | 5/57 (9.1)            | -                  |
| 10 kg to less than 20 kg                     | 7/113 (6.4)                               | 2/47 (4.3)        | 5/57 (9.1)            | 1.79(0.24-13.2)    |
| 20 kg to less than 30 kg                     | 32/113 (29.1)                             | 18/47 (38.3)      | 14/57 (25.5)          | 0.56(0.14-2.13)    |
| 30 kg to less than 40 kg                     | 39/113 (35.5)                             | 16/47 (34.0)      | 22/57 (40.0)          | 0.98(0.26-3.67)    |
| 40 kg and above                              | 18/113 (16.4)                             | 6/47 (12.8)       | 9/57 (16.4)           | 1.07(0.23-5.02)    |
| <b>Preexisting Conditions</b>                |                                           |                   |                       |                    |
| Diabetes mellitus                            | 2/113 (1.8)                               | 2/47 (4.3)        | 0/57 (0)              | N.D.               |
| Surgical implants                            | 13/113 (11.5)                             | 5/47 (10.6)       | 6/57 (10.5)           | 1.20(0.37-3.93)    |
| Neoplasia                                    | 11/113 (9.7)                              | 6/47 (12.8)       | 4/57 (7.0)            | 0.67(0.19-2.36)    |
| Immunosuppression                            | 27/113 (23.9)                             | 14/47 (29.8)      | 12/57 (21.1)          | 0.86(0.40-1.85)    |
| Antibiotics in past 30d                      | 80/113 (80.8)                             | 34/47 (72.3)      | 41/57 (71.9)          | 1.21(0.77-1.90)    |
| Chronic kidney disease                       | 21/113 (18.6)                             | 9/47 (19.2)       | 8/57 (14.0)           | 0.89(0.34-2.30)    |
| <b>Number Positive Blood culture Bottles</b> |                                           |                   |                       |                    |
| 0 Positive                                   | 48/89 (53.9)                              | 31/44 (70.5)      | 13/39 (33.3)          | -                  |
| 1 Positive                                   | 3/89 (3.4)                                | 1/44 (2.3)        | 2/39 (5.1)            | 2.25(0.13-39.05)   |
| 2 Positive                                   | 7/89 (7.9)                                | 1/44 (2.3)        | 5/39 (12.8)           | 15.75(1.74-142.56) |
| ≥3 Positive                                  | 31/89 (34.8)                              | 11/44 (25.0)      | 19/39 (48.7)          | 3.48(1.26-9.63)    |
| <b>Bacterial Identified</b>                  |                                           |                   |                       |                    |
| Non-Bartonella Species                       | 46/53 (86.8)                              | 13/16 (81.3)      | 31/35 (88.6)          | -                  |
| Bartonella Species                           | 7/53 (13.2)                               | 3/16 (18.8)       | 4/35 (11.4)           | 1.33(0.30-5.96)    |
| <b>Valve Involved</b>                        |                                           |                   |                       |                    |
| Mitral Valve                                 | 58/113 (51.3)                             | 27/47 (57.4)      | 27/57 (47.4)          | -                  |
| Aortic Valve                                 | 37/113 (32.7)                             | 17/47 (36.2)      | 18/57 (31.6)          | 1.17(0.49-2.77)    |
| Mitral and Aortic Valve                      | 16/113 (14.1)                             | 3/47 (6.4)        | 10/57 (17.5)          | 3.46(0.86-14.01)   |
| Other Valves                                 | 2/113 (1.8)                               | 0/47 (0)          | 2/57 (3.5)            | 3.11(0.30-31.30)   |
| <b>Clinicopathologic Data</b>                |                                           |                   |                       |                    |
| Anemia                                       | 53/91 (58.2)                              | 19/40 (47.5)      | 31/45 (68.9)          | 2.48(1.01-5.93)    |
| Neutrophilia                                 | 63/91 (69.2)                              | 22/40 (55.0)      | 37/45 (82.2)          | 3.78(1.41-10.14)   |
| Thrombocytopenia                             | 46/91 (50.5)                              | 20/40 (50.0)      | 26/45 (57.8)          | 1.37(0.58-3.22)    |
| Hyperbilirubinemia                           | 31/78 (39.7)                              | 12/34 (35.3)      | 18/39 (46.2)          | 1.57(0.61-4.04)    |
| Azotemia                                     | 21/78 (26.9)                              | 2/34 (5.9)        | 17/39 (43.6)          | 12.36(2.59-58.98)  |
| Hypoglycemia                                 | 16/78 (20.5)                              | 4/34 (11.8)       | 12/39 (30.8)          | 3.33(0.96-11.58)   |
| Hypoalbuminemia                              | 67/78 (85.9)                              | 27/34 (79.4)      | 37/39 (94.9)          | 1.37(0.83-2.25)    |
| <b>Treatments</b>                            |                                           |                   |                       |                    |
| Received IV Antibiotics                      | 82/99 (82.8)                              | 36/47 (76.6)      | 42/45 (93.3)          | 4.28(1.11-16.53)   |
| Received Antithrombotics                     | 24/99 (24.2)                              | 16/47 (34.0)      | 7/45 (15.6)           | 0.36(0.13-0.97)    |
| Received Cardiac Medications                 | 26/99 (26.3)                              | 11/47 (23.4)      | 15/45 (33.3)          | 1.66(0.65-4.09)    |
| Required ICU hospitalization                 | 34/99 (34.3)                              | 11/47 (23.4)      | 23/45 (51.1)          | 3.13(1.28-7.64)    |
| <b>Concurrent Disease Processes</b>          |                                           |                   |                       |                    |
| Congestive Heart Failure                     | 16/113 (14.2)                             | 1/47 (2.1)        | 13/57 (22.8)          | 11.83(1.43-97.78)  |
| Acute Kidney Injury                          | 29/113 (25.7)                             | 6/47 (12.8)       | 21/57 (36.8)          | 6.20(2.04-18.83)   |
| Thromboembolic Disease                       | 45/113 (39.8)                             | 10/47 (21.3)      | 33/57 (57.9)          | 5.71(2.26-14.44)   |
| Neutrophilic Polyarthritits                  | 11/19 (57.9)                              | 6/11 (54.5)       | 5/8 (62.5)            | 1.39(0.27-8.92)    |
