# Supplementary material for: Outcome and prognostic factors in infective endocarditis in dogs: 113 cases (2005‐2020)
Source: PubMed Central journal article supplement — J Vet Intern Med. 2022 Mar 9;36(2):429–40. doi: 10.1111/jvim.16380 (PMC8965206; doi:10.1111/jvim.16380), 2022-03-09
Supplement: JVIM-36-429-s002.pdf [file JVIM-36-429-s002.pdf]

**Antimicrobial Treatment Regimen****No. of Dogs Receiving Therapy**

|                                                                                                                    |    |
|--------------------------------------------------------------------------------------------------------------------|----|
| Amoxicillin/Clavulanic acid, Ampicillin/Sulbactam, Enrofloxacin                                                    | 15 |
| Amoxicillin/Clavulanic acid, Enrofloxacin                                                                          | 11 |
| Ampicillin/Sulbactam, Enrofloxacin                                                                                 | 7  |
| Enrofloxacin, ticarcillin/clavulanate                                                                              | 4  |
| Amoxicillin/Clavulanic acid, Doxycycline, Enrofloxacin                                                             | 3  |
| Amikacin, Amoxicillin/Clavulanic acid, Ampicillin, Enrofloxacin                                                    | 2  |
| Amoxicillin/Clavulanic acid, Ampicillin, Enrofloxacin                                                              | 2  |
| Amoxicillin/Clavulanic acid, Ampicillin/Sulbactam                                                                  | 2  |
| Amoxicillin/Clavulanic acid, Ampicillin/Sulbactam, Enrofloxacin, Metronidazole                                     | 2  |
| Ampicillin, Ampicillin/Sulbactam, Enrofloxacin                                                                     | 2  |
| Ampicillin, Doxycycline, Enrofloxacin                                                                              | 2  |
| Ampicillin, Enrofloxacin                                                                                           | 2  |
| Ampicillin/Sulbactam, Clindamycin                                                                                  | 2  |
| Clindamycin, Enrofloxacin                                                                                          | 2  |
| Enrofloxacin                                                                                                       | 2  |
| Amikacin, Amoxicillin/Clavulanic acid, Ampicillin                                                                  | 1  |
| Amikacin, Amoxicillin/Clavulanic acid, Ampicillin/Sulbactam, Chloramphenicol, Enrofloxacin, Metronidazole          | 1  |
| Amikacin, Amoxicillin/Clavulanic acid, Ampicillin/Sulbactam, Enrofloxacin, Neomycin                                | 1  |
| Amikacin, Ampicillin                                                                                               | 1  |
| Amikacin, Ampicillin, Doxycycline, Metronidazole, Rifampin                                                         | 1  |
| Amikacin, Ampicillin/Sulbactam, Ceftazidime, Enrofloxacin, Piperacillin/tazobactam                                 | 1  |
| Amikacin, Ceftazidime, amoxicillin                                                                                 | 1  |
| Amoxicillin, Ampicillin, Ampicillin/Sulbactam, Enrofloxacin                                                        | 1  |
| Amoxicillin, Ampicillin, Doxycycline, Doxycycline, Enrofloxacin                                                    | 1  |
| Amoxicillin, Ampicillin, Doxycycline, Enrofloxacin, Timentin                                                       | 1  |
| Amoxicillin, Ampicillin, Enrofloxacin                                                                              | 1  |
| Amoxicillin, Ampicillin, Enrofloxacin, ciprofloxacin                                                               | 1  |
| Amoxicillin, Clindamycin                                                                                           | 1  |
| Amoxicillin, Doxycycline, Enrofloxacin                                                                             | 1  |
| Amoxicillin, Enrofloxacin, Cephalexin                                                                              | 1  |
| Amoxicillin/Clavulanic acid, Ampicillin, Cefazolin, Cephalexin, Enrofloxacin                                       | 1  |
| Amoxicillin/Clavulanic acid, Ampicillin, Doxycycline, Doxycycline, Enrofloxacin, ticarcillin/clavulanate           | 1  |
| Amoxicillin/Clavulanic acid, Ampicillin, Doxycycline, Doxycycline, Metronidazole, Amikacin                         | 1  |
| Amoxicillin/Clavulanic acid, Ampicillin/Sulbactam, Doxycycline, Enrofloxacin                                       | 1  |
| Amoxicillin/Clavulanic acid, Ampicillin/Sulbactam, Enrofloxacin, Metronidazole, Tylosin                            | 1  |
| Amoxicillin/Clavulanic acid, Doxycycline                                                                           | 1  |
| Amoxicillin/Clavulanic acid, Enrofloxacin, Metronidazole                                                           | 1  |
| Amoxicillin/Clavulanic acid, Enrofloxacin, Neomycin, ticarcillin/clavulanate                                       | 1  |
| Ampicillin, Amoxicillin                                                                                            | 1  |
| Ampicillin, Ampicillin/Sulbactam, Cefpodoxime, Ceftazidime, Chloramphenicol, Doxycycline, Enrofloxacin, Gentamicin | 1  |
| Ampicillin, Enrofloxacin, Metronidazole                                                                            | 1  |
| Ampicillin, Metronidazole                                                                                          | 1  |
| Ampicillin/Sulbactam                                                                                               | 1  |
| Ampicillin/sulbactam, Ampicillin/clavulonic acid                                                                   | 1  |
| Ampicillin/Sulbactam, Ceftazidime, Enrofloxacin, Neomycin                                                          | 1  |
| Ampicillin/Sulbactam, Clindamycin, Enrofloxacin                                                                    | 1  |
| Ampicillin/Sulbactam, Clindamycin, Enrofloxacin, Itraconazole                                                      | 1  |
| Ampicillin/Sulbactam, Clindamycin, Meropenem                                                                       | 1  |
| Ampicillin/Sulbactam, Enrofloxacin, cefazolin                                                                      | 1  |
| Ampicillin/Sulbactam, Enrofloxacin, Neomycin                                                                       | 1  |
| Chloramphenicol, Doxycycline, Enrofloxacin, Vancomycin                                                             | 1  |
| Doxycycline                                                                                                        | 1  |
| Doxycycline, Enrofloxacin                                                                                          | 1  |
| Doxycycline, rifampin                                                                                              | 1  |
