# Supplementary material for: Outcome and prognostic factors in infective endocarditis in dogs: 113 cases (2005‐2020)
Source: PubMed Central journal article supplement — J Vet Intern Med. 2022 Mar 9;36(2):429–40. doi: 10.1111/jvim.16380 (PMC8965206; doi:10.1111/jvim.16380), 2022-03-09
Supplement: JVIM-36-429-s003.pdf [file JVIM-36-429-s003.pdf]

| <b>Antithrombotics</b>   | <b>Number treated</b> |
|--------------------------|-----------------------|
| Clopidogrel              | 15                    |
| Enoxaparin               | 3                     |
| Aspirin                  | 3                     |
| Rivaroxaban              | 1                     |
| Clopidogrel, Enoxaparin  | 1                     |
| Clopidogrel, Rivaroxaban | 1                     |
